# Supplementary material
Source: PubMed Central journal article supplement (PMC4924349)

## Supplemental Material

- Supplemental Tables
- Supplemental Figures

Supplemental Table 1. ICD-9-CM diagnosis codes used to identify site-specific cancer cases from Medicare claims.

| Cancer site                                                                        | ICD-9-CM diagnosis codes                   |
|------------------------------------------------------------------------------------|--------------------------------------------|
| Lip, oral cavity, and pharynx                                                      |                                            |
| Lip                                                                                | 140.XX                                     |
| Tongue                                                                             | 141.XX                                     |
| Salivary gland                                                                     | 142.XX                                     |
| Mouth                                                                              | 143.XX-145.XX                              |
| Pharynx                                                                            | 146.XX-148.XX                              |
| Other and ill-defined sites within the lip, oral cavity, and pharynx               | 149.XX                                     |
| Digestive system                                                                   |                                            |
| Esophagus                                                                          | 150.XX                                     |
| Stomach                                                                            | 151.XX                                     |
| Small intestine                                                                    | 152.XX                                     |
| Colon/rectum                                                                       | 153.XX, 154.0, 154.1, 154.8                |
| Anus                                                                               | 154.2, 154.3                               |
| Liver and intrahepatic bile duct                                                   | 155.XX                                     |
| Gallbladder and other biliary                                                      | 156.XX                                     |
| Pancreas                                                                           | 157.XX                                     |
| Other and ill-defined sites within the digestive organs and peritoneum             | 158.XX (except for 158.8),159.XX           |
| Respiratory system and intrathoracic organs                                        |                                            |
| Nasal cavity, middle ear, and sinus                                                | 160.XX                                     |
| Larynx                                                                             | 161.XX                                     |
| Lung/bronchus                                                                      | 162.XX (except for 162.0)                  |
| Trachea                                                                            | 162.0                                      |
| Other and ill-defined sites within the respiratory system and intrathoracic organs | 163.XX-165.XX (except for 163.9 and 164.1) |
| Bone and cartilage                                                                 | 170.XX                                     |
| Skin/connective tissue (excludes non-melanoma skin cancer)                         |                                            |
| Melanoma                                                                           | 172.XX                                     |
| Connective & other soft tissue                                                     | 171.XX                                     |
| Kaposi sarcoma                                                                     | 176.XX                                     |
| Breast                                                                             |                                            |
| Breast (female), malignant and <i>in situ</i>                                      | 174.XX, 233.0                              |
| Breast (male), malignant and <i>in situ</i>                                        | 175.XX, 233.0                              |
| Genitourinary                                                                      |                                            |
| Cervix uteri                                                                       | 180.XX                                     |
| Corpus and uterus                                                                  | 179.XX, 182.XX                             |
| Placenta                                                                           | 181.XX                                     |
| Ovary                                                                              | 183.0                                      |
| Vagina                                                                             | 184.0                                      |
| Vulva                                                                              | 184.1-184.4                                |
| Uterine adnexa, not including ovaries                                              | 183.2-183.9                                |
| Other and unspecified female genital organs                                        | 184.8-184.9                                |

|                                           |                                |
|-------------------------------------------|--------------------------------|
| Prostate                                  | 185.XX                         |
| Testis                                    | 186.XX                         |
| Penis                                     | 187.1-187.4                    |
| Other and unspecified male genital organs | 187.5-187.9                    |
| Bladder, malignant & <i>in situ</i>       | 188.XX, 233.7                  |
| Kidney and renal pelvis                   | 189.0, 189.1                   |
| Ureter                                    | 189.2                          |
| Other and unspecified urinary organs      | 189.3-189.9                    |
| Other                                     |                                |
| Eye                                       | 190.XX                         |
| Brain and other nervous system            | 191.XX-192.XX                  |
| Mesothelioma                              | 158.8, 163.9, 164.1            |
| Thyroid                                   | 193.XX                         |
| Other endocrine glands and structures     | 194.XX                         |
| Hematological                             |                                |
| Lymphoma: Hodgkin's disease               | 201.XX                         |
| Lymphoma: Non-Hodgkin lymphoma            | 200.XX, 202.XX excluding 202.4 |
| Multiple myeloma                          | 203.0                          |
| Leukemia                                  | 202.4, 204.XX-208.XX           |
| Ill-defined and unspecified               | 195.XX-199.XX                  |

---

Abbreviation: International Classification of Diseases, 9th revision, Clinical Modification, ICD-9-CM.

Supplemental Table 2. Administrative codes used to identify anemia treatment.

| Anemia treatment   | Codes                                                                                                          |
|--------------------|----------------------------------------------------------------------------------------------------------------|
| Epoetin alfa       | USRDS summarized variables: epo, epoadmin, epodose, n_epo                                                      |
| Darbepoetin alfa   | HCPCS: J0880, J0881, J0882, Q0137, Q4054                                                                       |
| Iron               | HCPCS: J1750, J1760, J1770, J1780, J1751, J1752, J2915, J2916, S0098, W0231, J1755, J1756, Q0138, Q0139        |
| Blood transfusions | ICD-9-CM procedure codes: 99.03, 99.04<br>HCPCS: P9010, P9011, P9016, P9021, P9022, P9038, P9039, P9040, 36430 |

Supplemental Table 3. Administrative codes used to identify receipt of any chemotherapy from Medicare claims.

| Medicare claims code type | Codes                                                                                                                                                                                                                                                     |
|---------------------------|-----------------------------------------------------------------------------------------------------------------------------------------------------------------------------------------------------------------------------------------------------------|
| ICD-9-CM diagnosis codes  | V58.1, V66.2, V67.2                                                                                                                                                                                                                                       |
| ICD-9-CM procedure codes  | 99.25                                                                                                                                                                                                                                                     |
| HCPCS                     | 964xx, 965xx, C1167, C9127, C9205, C9213, C9214, C9215, C9257, C9414, C9415, C9418, C9420, C9421, C9425, C9427, C9431, C9432, C9440, J8520, J8521, J8530, J8560, J8565, J8610, J9000-J9999, G0355-G0362 (for 2005 only), Q0083-Q0085, Q2024, S0116, S1016 |
| Revenue center codes      | 0331, 0332, 0335                                                                                                                                                                                                                                          |

Abbreviations: International Classification of Diseases, 9th revision, Clinical Modification, ICD-9-CM; Healthcare Common Procedure Coding System, HCPCS.

Supplemental Table 4. Distribution of site-specific cancer cases by year.\*

| Cancer Site                                                   | 2000 | 2001 | 2002 | 2003 | 2004 | 2005 | 2006 | 2007   | 2008   | 2009   | 2010   | 2011   |
|---------------------------------------------------------------|------|------|------|------|------|------|------|--------|--------|--------|--------|--------|
| Breast (female)                                               | 516  | 632  | 724  | 808  | 878  | 976  | 998  | 1067   | 1122   | 1183   | 1211   | 1240   |
| Colon/rectum                                                  | 629  | 763  | 843  | 913  | 1031 | 1087 | 1089 | 1200   | 1223   | 1219   | 1275   | 1298   |
| Kidney/renal pelvis                                           | 331  | 449  | 501  | 585  | 716  | 825  | 928  | 1072   | 1148   | 1248   | 1333   | 1337   |
| Leukemia                                                      | 125  | 163  | 183  | 199  | 201  | 214  | 253  | 252    | 276    | 294    | 315    | 361    |
| Lung/bronchus                                                 | 504  | 612  | 696  | 760  | 799  | 847  | 899  | 896    | 947    | 933    | 981    | 970    |
| Hodgkin lymphoma                                              | 12   | 10   | 14   | 25   | 29   | 35   | 38   | 36     | 36     | 47     | 42     | 50     |
| Myeloma                                                       | 177  | 197  | 223  | 239  | 242  | 271  | 263  | 263    | 301    | 316    | 308    | 331    |
| NHL                                                           | 142  | 188  | 194  | 206  | 237  | 282  | 314  | 345    | 387    | 385    | 388    | 404    |
| Pancreas                                                      | 86   | 107  | 125  | 108  | 132  | 146  | 181  | 165    | 180    | 187    | 210    | 206    |
| Prostate                                                      | 863  | 1050 | 1167 | 1283 | 1404 | 1501 | 1625 | 1694   | 1798   | 1896   | 1938   | 1908   |
| Bladder                                                       | 270  | 373  | 422  | 458  | 528  | 553  | 570  | 611    | 629    | 626    | 632    | 631    |
| Other**                                                       | 1276 | 1481 | 1662 | 1797 | 1969 | 2171 | 2334 | 2412   | 2551   | 2646   | 2702   | 2752   |
| Multiple sites***                                             | 150  | 166  | 182  | 217  | 252  | 262  | 277  | 300    | 333    | 343    | 374    | 410    |
| Total (including patients with missing ethnicity information) | 5081 | 6191 | 6936 | 7598 | 8418 | 9170 | 9769 | 10,313 | 10,931 | 11,323 | 11,709 | 11,898 |
| Total patients missing ethnicity                              | 19   | 17   | 14   | 9    | 16   | 15   | 16   | 14     | 13     | 15     | 14     | 23     |
| Total (excluding patients with missing ethnicity information) | 5062 | 6174 | 6922 | 7589 | 8402 | 9155 | 9753 | 10,299 | 10,918 | 11,308 | 11,695 | 11,875 |

Abbreviation: Non-Hodgkin lymphoma, NHL.

\*Cancer cases may be included in multiple years.

\*\*Other cancers were defined as all other site-specific cancers not listed (e.g., cancers of the esophagus, stomach, liver, etc).

\*\*\*Multiple sites indicates patients diagnosed with first cancer at  $\geq 2$  sites on the same date.

Supplemental Figure 1. Distribution of cancer diagnoses by first cancer site and year. Other cancers were defined as all other site-specific cancers not listed (e.g., cancers of the esophagus, stomach, liver, etc.). Multiple sites indicates patients diagnosed with first cancer at  $\geq 2$  sites on the same date. Abbreviation: non-Hodgkin lymphoma, NHL.

Supplemental Figure 2. Mean quarterly ESA use by drug type. Quarterly data points were adjusted for age, sex, race, ethnicity, cause of ESRD, and dialysis vintage. Trend lines represent smoothed conditional means.



Supplemental Figures 3a-f. Quarterly trends in anemia management treatment by hematologic malignancy for mean a) ESA use; b) iron use; c) blood transfusion use; d) EPO dose; e) iron dose; and f) hemoglobin levels. Patients treated at a hospital-based facility were excluded from the EPO dose calculation to remove the possibility of simultaneous treatment with EPO and darbepoetin alfa. Quarterly data points were adjusted for age, sex, race, ethnicity, cause of ESRD, and dialysis vintage. Trend lines represent smoothed conditional means. Abbreviation: non-Hodgkin lymphoma, NHL.

Supplemental Figures 4a-f. Quarterly trends in anemia management treatment by common solid tumor for mean a) ESA use; b) iron use; c) blood transfusion use; d) EPO dose; e) iron dose; and f) hemoglobin levels. Patients treated at a hospital-based facility were excluded from the EPO dose calculation to remove the possibility of simultaneous treatment with EPO and darbepoetin alfa. Quarterly data points were adjusted for age, sex, race, ethnicity, cause of ESRD, and dialysis vintage. Trend lines represent smoothed conditional means.

Supplemental Figure 5. Mean quarterly iron use by iron formulation. Quarterly data points were adjusted for age, sex, race, ethnicity, cause of ESRD, and dialysis vintage. Trend lines represent smoothed conditional means.

Supplemental Figures 6a-f. Quarterly trends in anemia management treatment by chemotherapy use for mean a) ESA use; b) iron use; c) blood transfusion use; d) EPO dose; e) iron dose; and f) hemoglobin levels. Patients treated at a hospital-based facility were excluded from the EPO dose calculation to remove the possibility of simultaneous treatment with EPO and darbepoetin alfa . Quarterly data points were adjusted for age, sex, race, ethnicity, cause of ESRD, and dialysis vintage. Trend lines represent smoothed conditional means.

Supplemental Figure 7a-f. Quarterly trends in anemia management treatment by age for mean a) ESA use; b) iron use; c) blood transfusion use; d) EPO dose; e) iron dose; and f) hemoglobin levels. Patients treated at a hospital-based facility were excluded from the EPO dose calculation to remove the possibility of simultaneous treatment with EPO and darbepoetin alfa. Quarterly data points were adjusted for age, sex, race, ethnicity, cause of ESRD, and dialysis vintage. Trend lines represent smoothed conditional means.

Supplemental Figures 8a-f. Quarterly trends in anemia management treatment by sex for mean a) ESA use; b) iron use; c) blood transfusion use; d) EPO dose; e) iron dose; and f) hemoglobin levels. Patients treated at a hospital-based facility were excluded from the EPO dose calculation to remove the possibility of simultaneous treatment with EPO and darbepoetin alfa. Quarterly data points were adjusted for age, sex, race, ethnicity, cause of ESRD, and dialysis vintage. Trend lines represent smoothed conditional means.

Supplemental Figures 9a-f. Quarterly trends in anemia management treatment by race for mean a) ESA use; b) iron use; c) blood transfusion use; d) EPO dose; e) iron dose; and f) hemoglobin levels. Patients treated at a hospital-based facility were excluded from the EPO dose calculation to remove the possibility of simultaneous treatment with EPO and darbepoetin alfa. Quarterly data points were adjusted for age, sex, race, ethnicity, cause of ESRD, and dialysis vintage. Trend lines represent smoothed conditional means.

Supplemental Figures 10a-f. Quarterly trends in anemia management treatment by ethnicity for mean a) ESA use; b) iron use; c) blood transfusion use; d) EPO dose; e) iron dose; and f) hemoglobin levels. Patients treated at a hospital-based facility were excluded from the EPO dose calculation to remove the possibility of simultaneous treatment with EPO and darbepoetin alfa. Quarterly data points were adjusted for age, sex, race, ethnicity, cause of ESRD, and dialysis vintage. Trend lines represent smoothed conditional means.



Supplemental Figures 11a-f. Quarterly trends in anemia management treatment by primary cause of ESRD for mean a) ESA use; b) iron use; c) blood transfusion use; d) EPO dose; e) iron dose; and f) hemoglobin levels. Patients treated at a hospital-based facility were excluded from the EPO dose calculation to remove the possibility of simultaneous treatment with EPO and darbepoetin alfa. Quarterly data points were adjusted for age, sex, race, ethnicity, cause of ESRD, and dialysis vintage. Trend lines represent smoothed conditional means.

Supplemental Figures 12a-f. Quarterly trends in anemia management treatment by dialysis vintage for mean a) ESA use; b) iron use; c) blood transfusion use; d) EPO dose; e) iron dose; and f) hemoglobin levels. Patients treated at a hospital-based facility were excluded from the EPO dose calculation to remove the possibility of simultaneous treatment with EPO and darbepoetin alfa. Quarterly data points were adjusted for age, sex, race, ethnicity, cause of ESRD, and dialysis vintage. Trend lines represent smoothed conditional means.

SFigure 1.

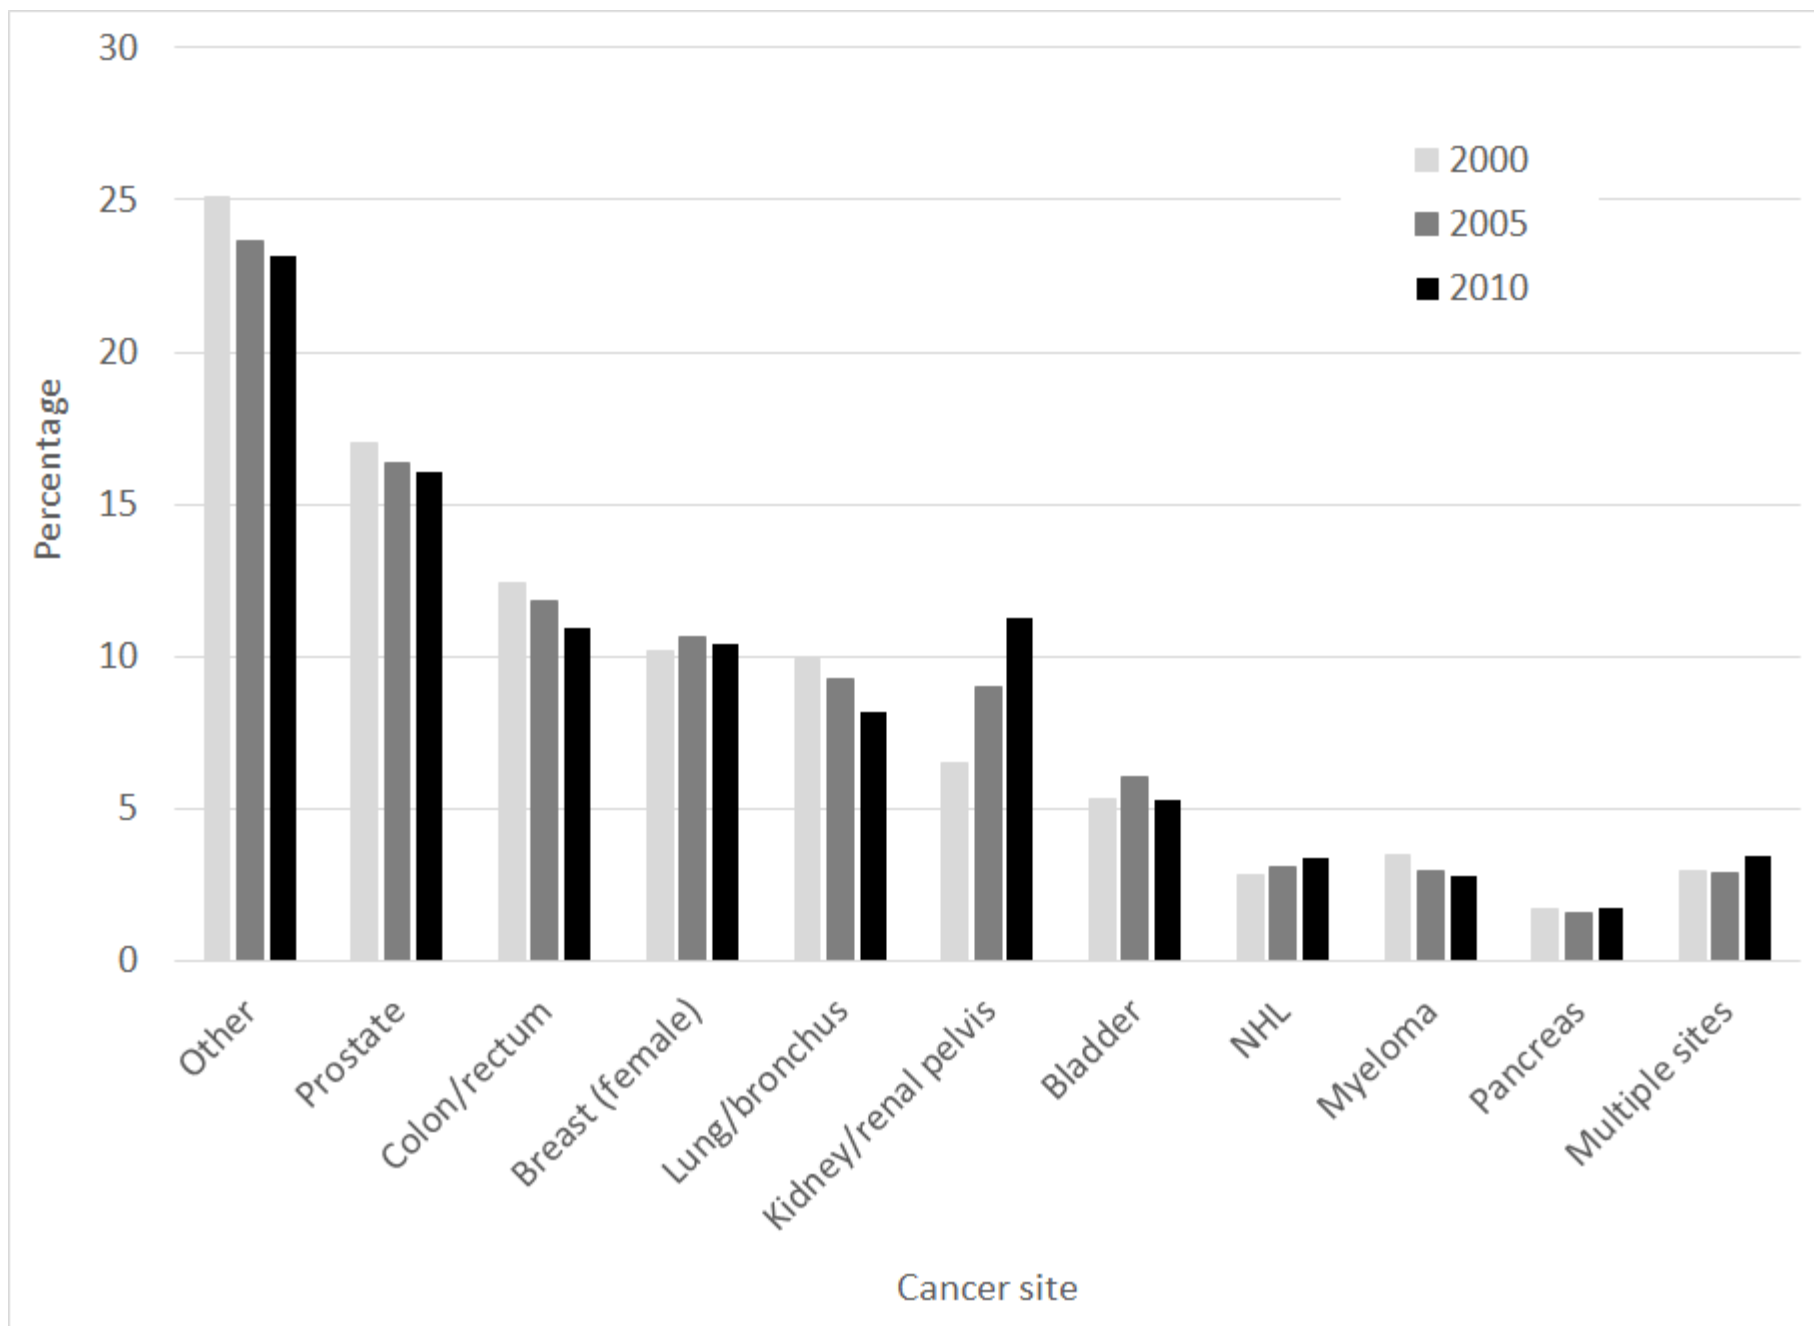

SFigure 2.

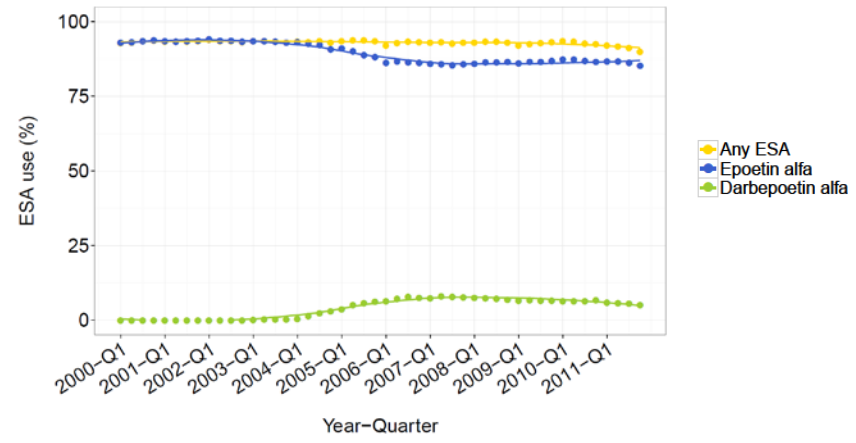

SFigure 3.

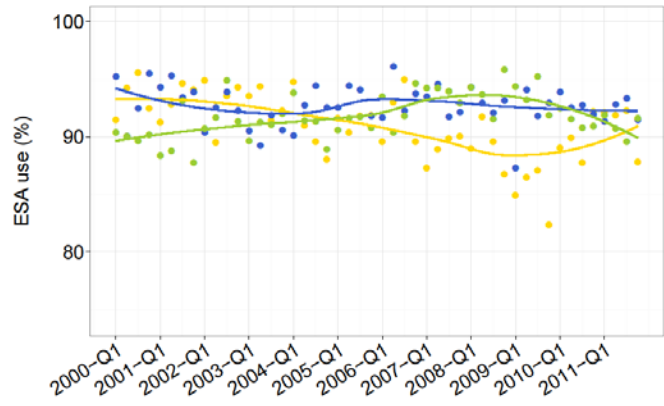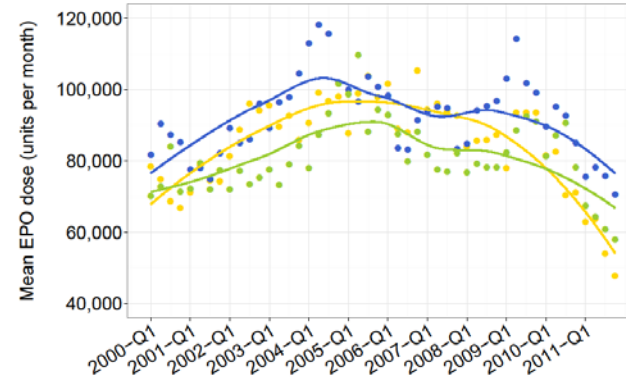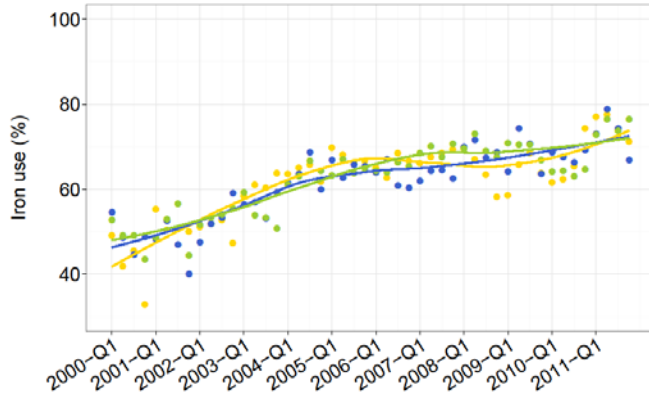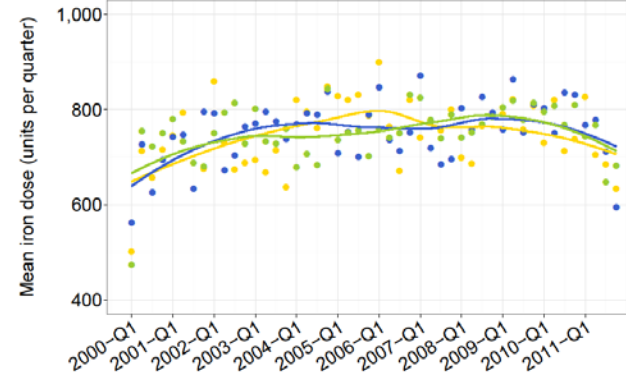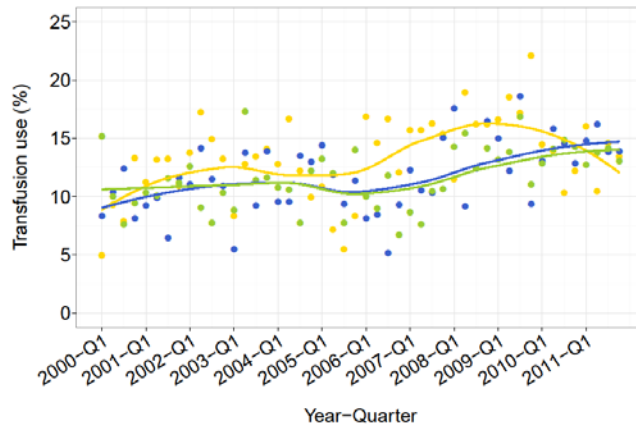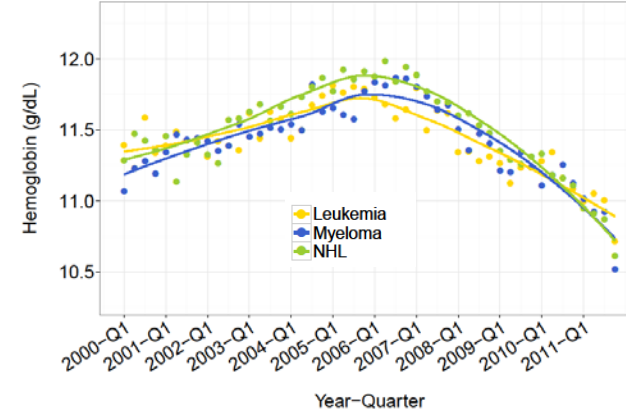

SFigure 4.

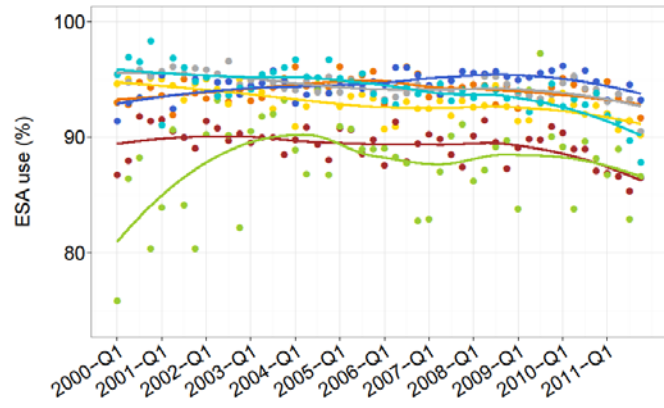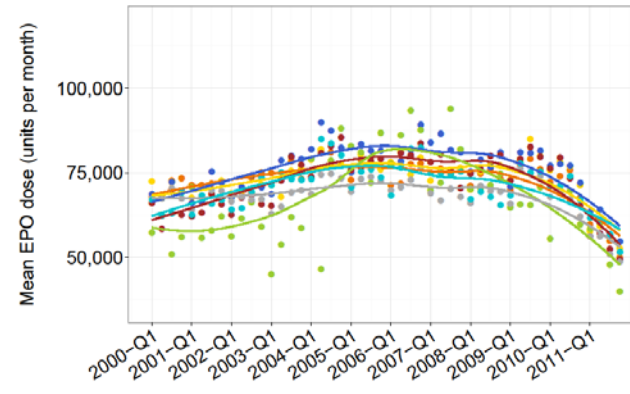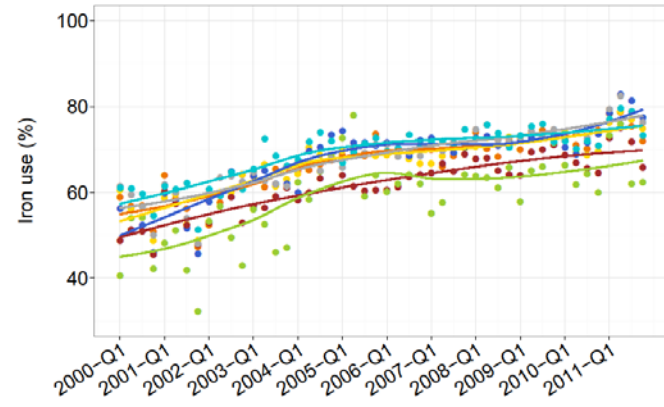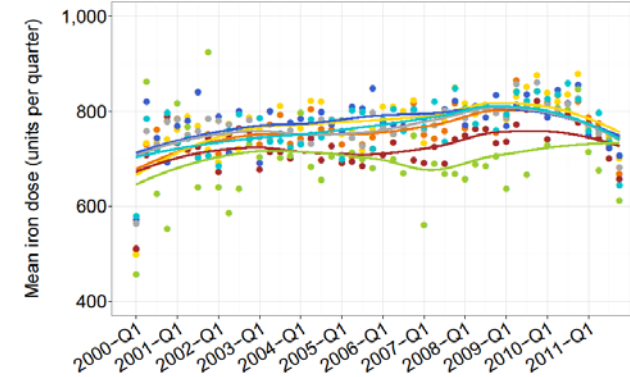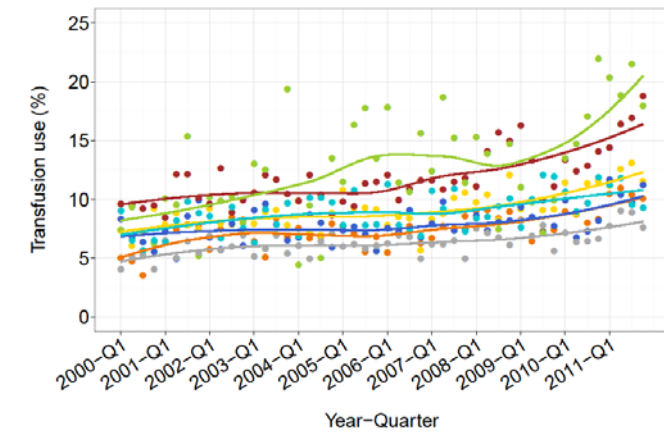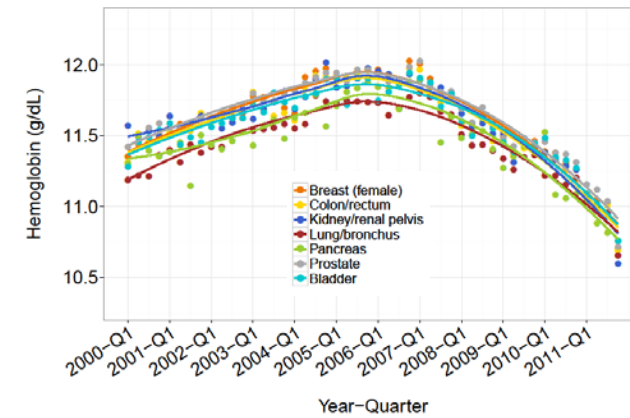

SFigure 5.

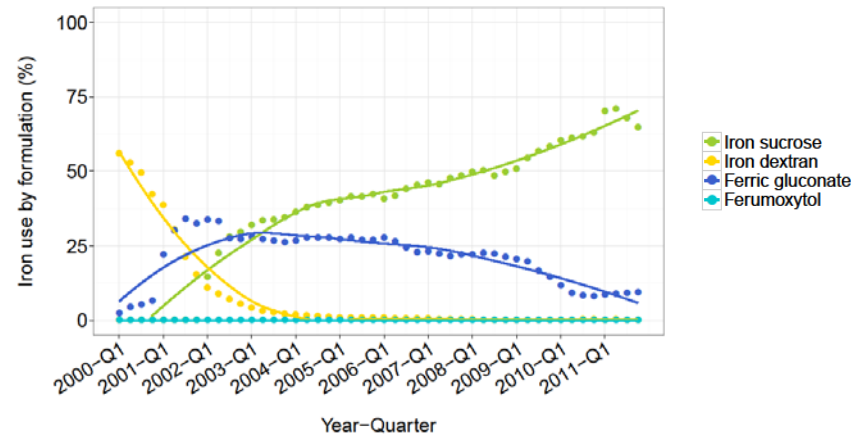

SFigure 6.

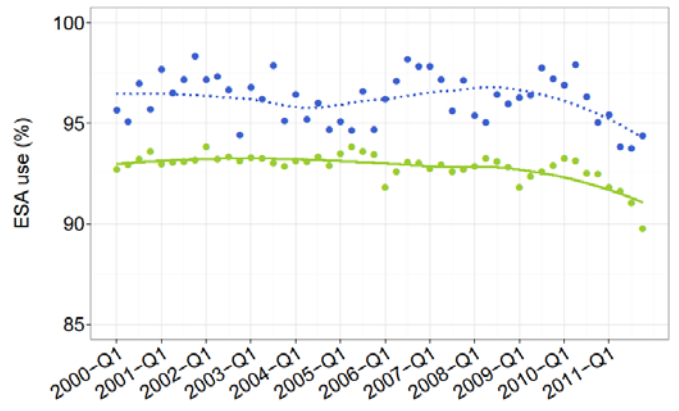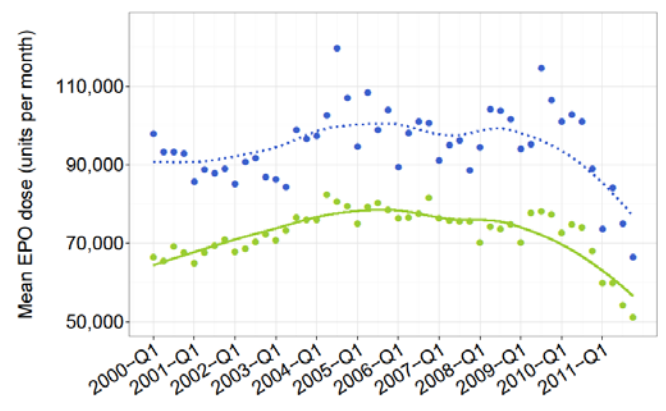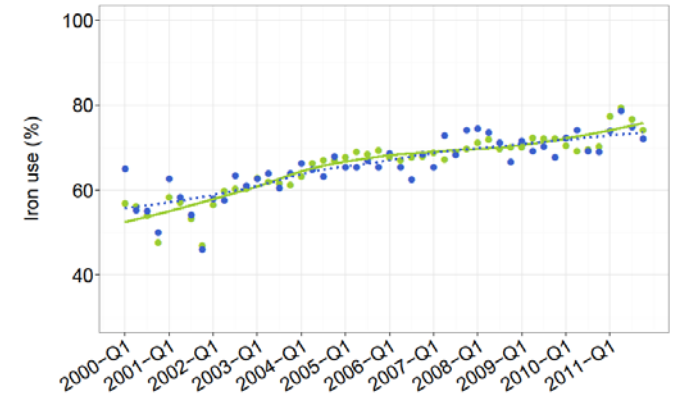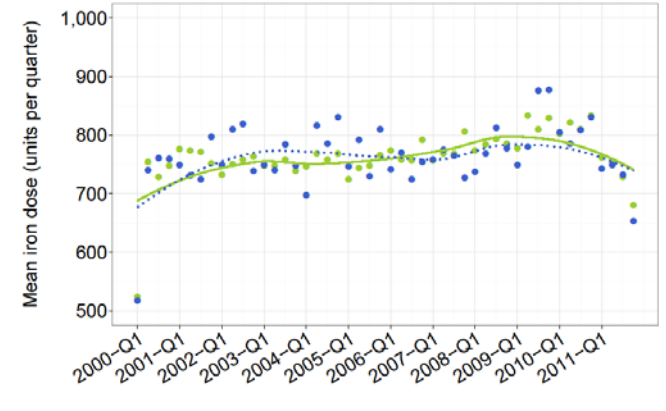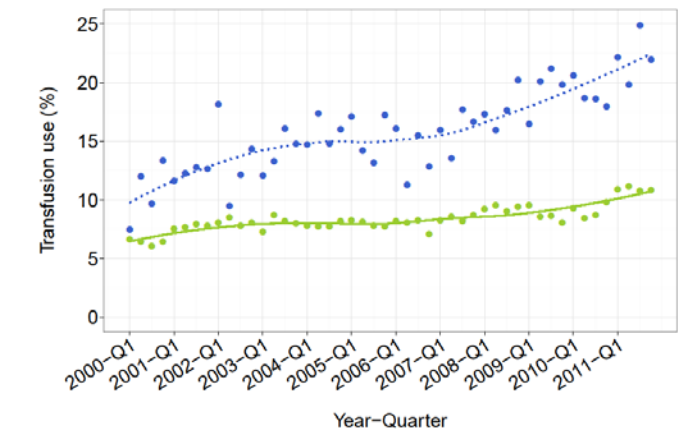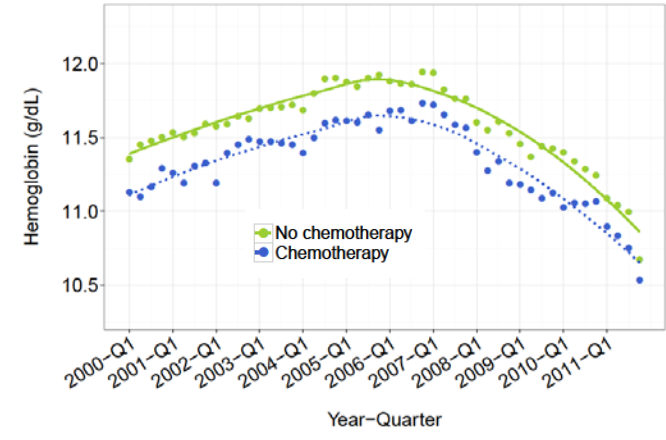



SFigure 7.

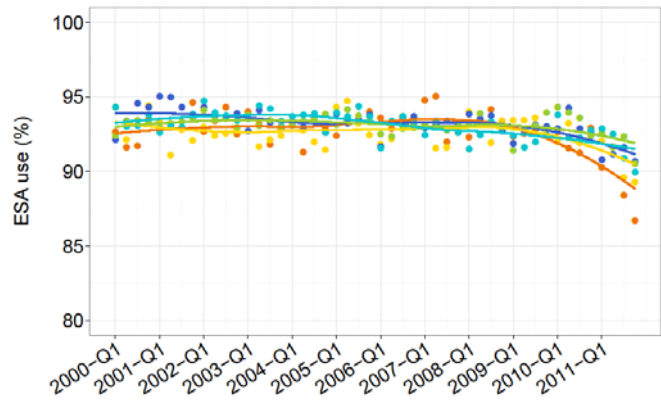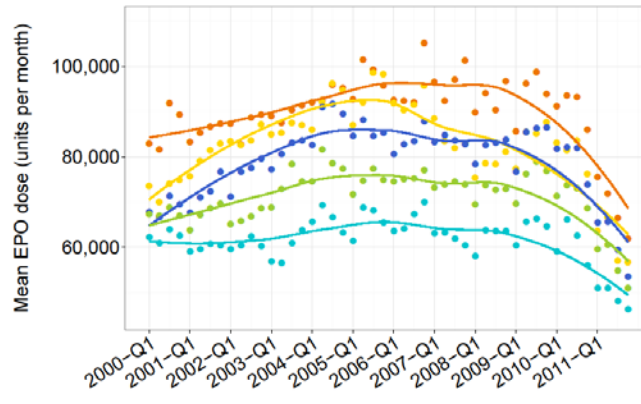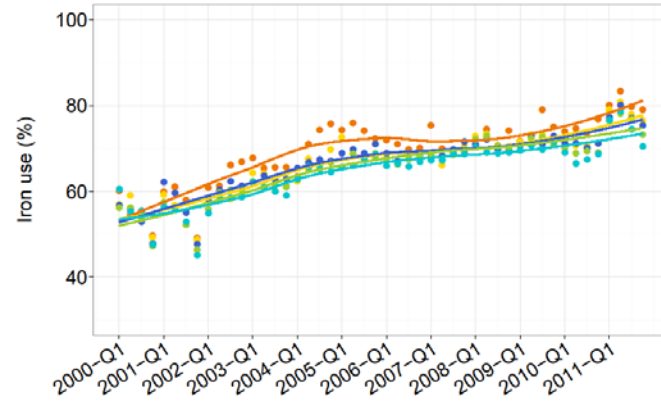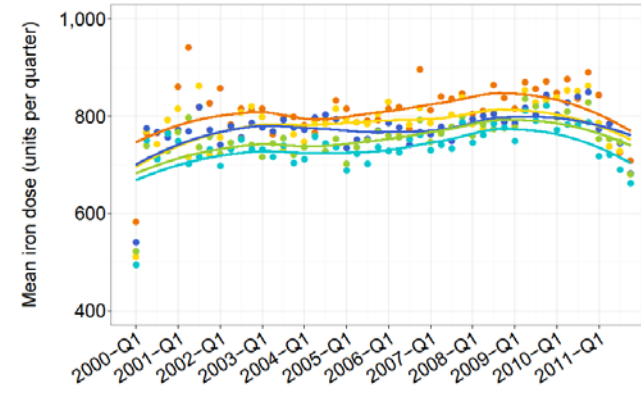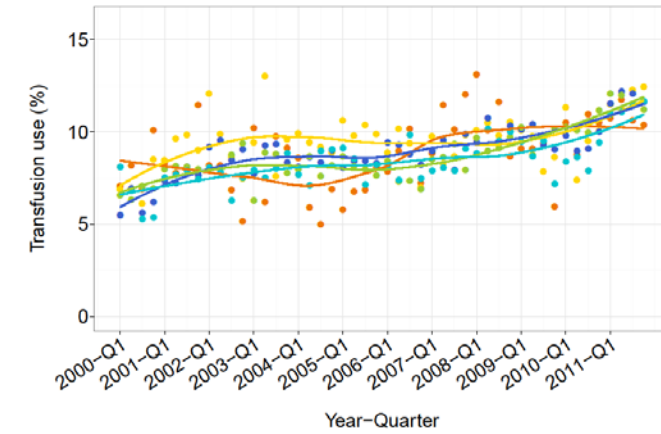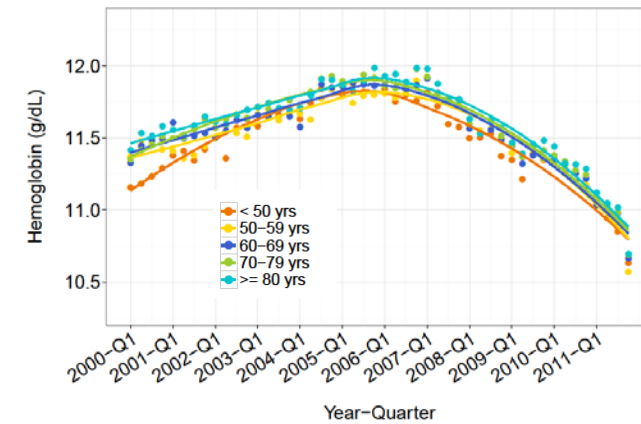

SFigure 8.

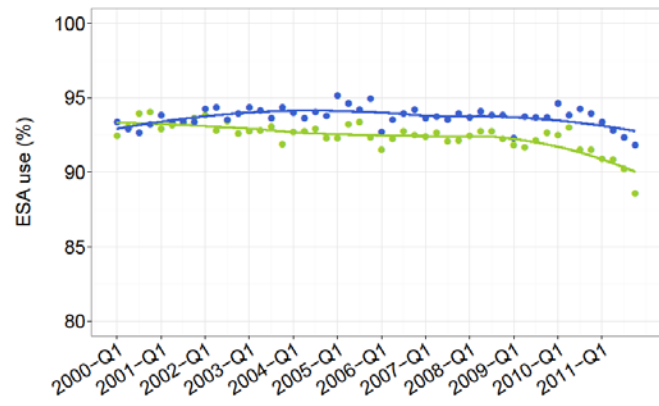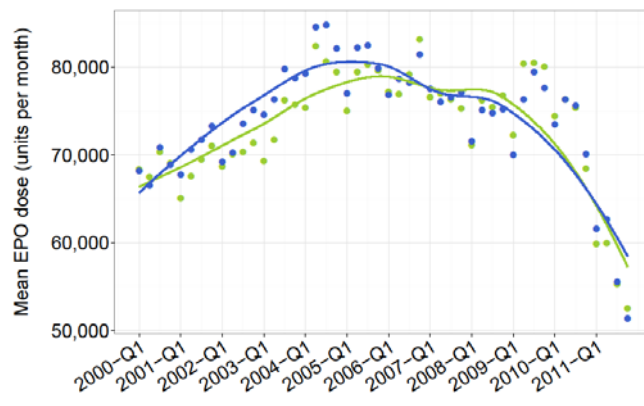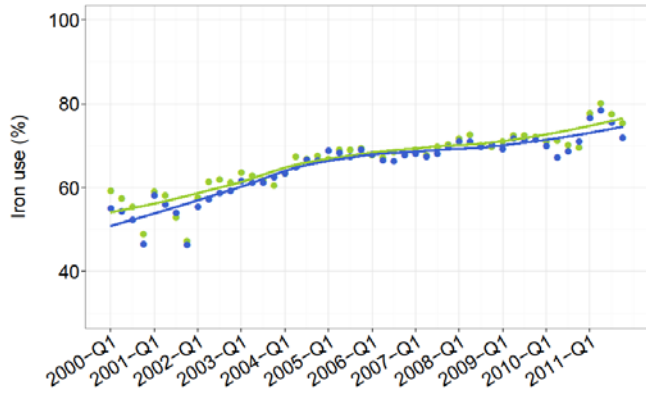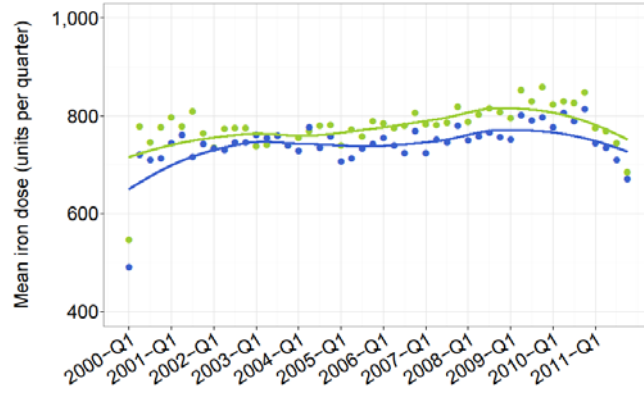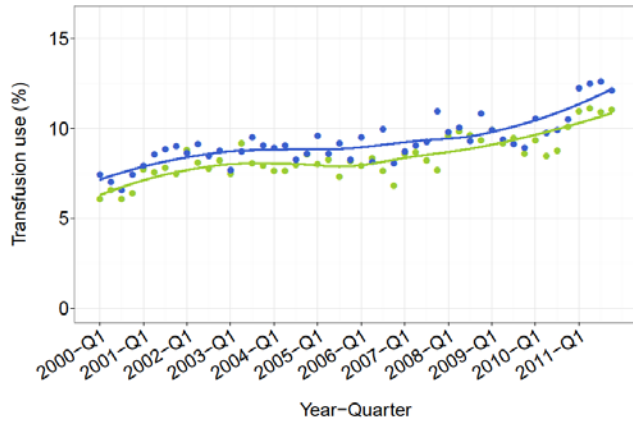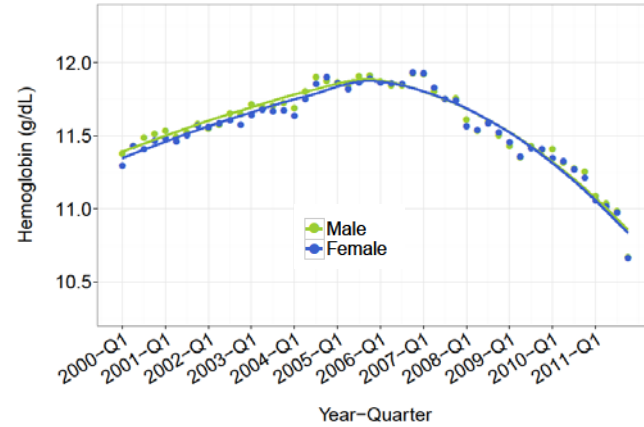

SFigure 9.

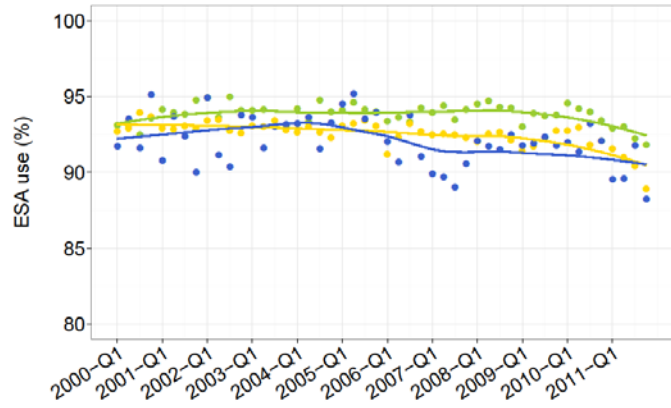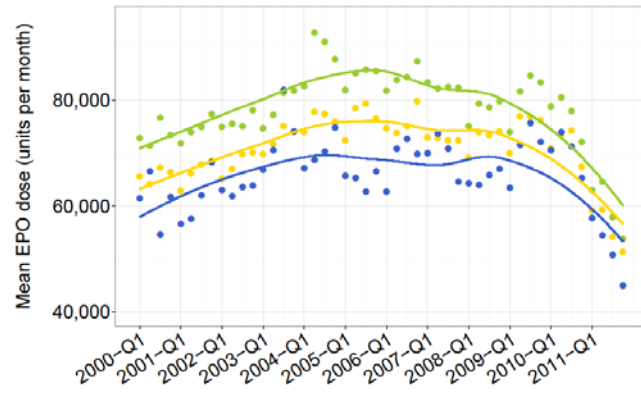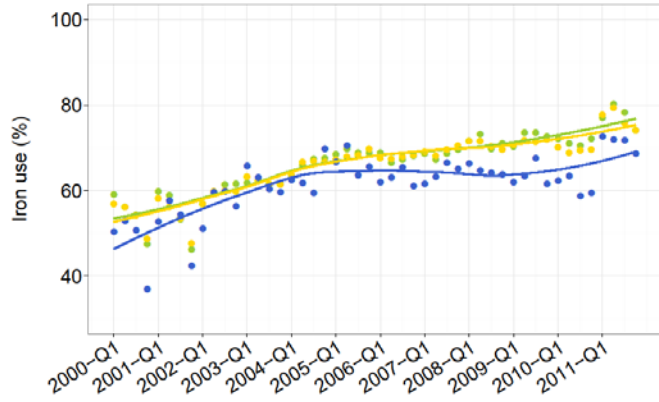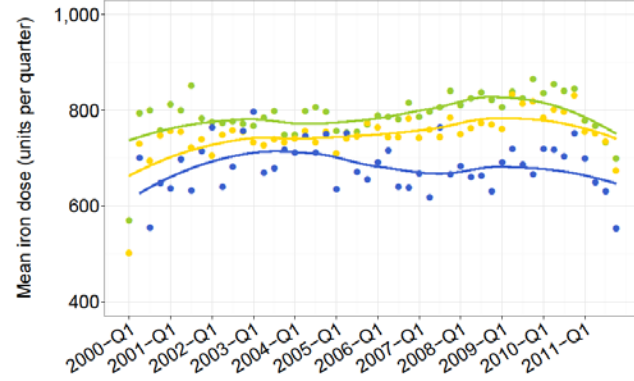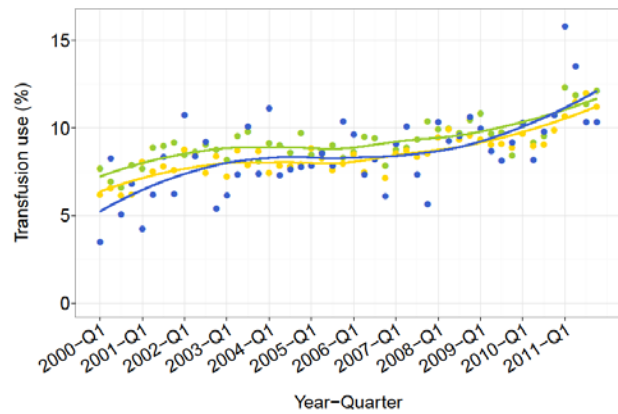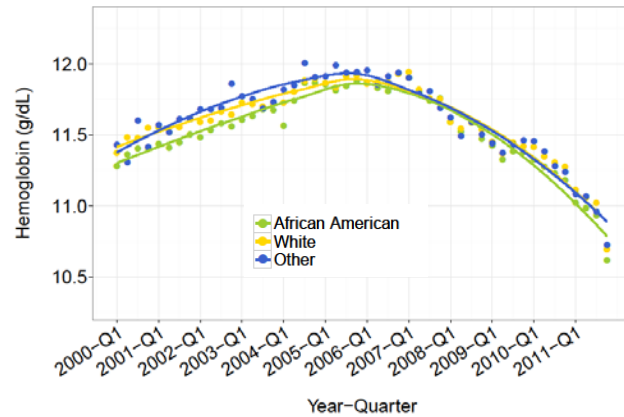

SFigure 10.

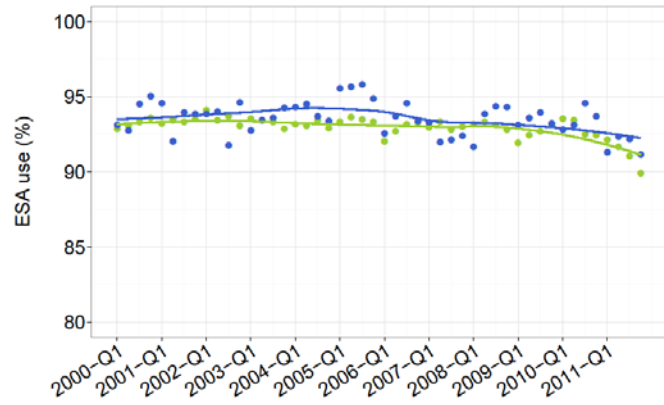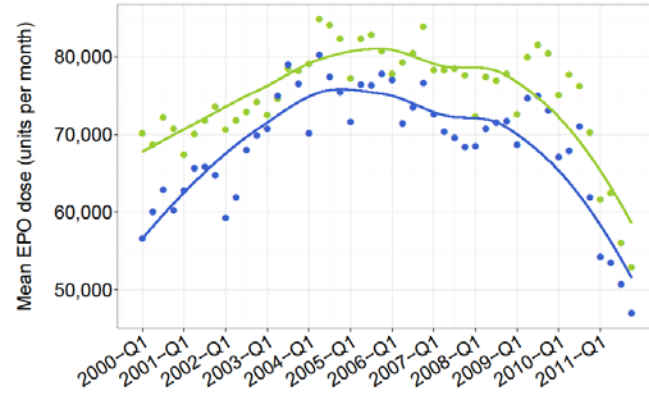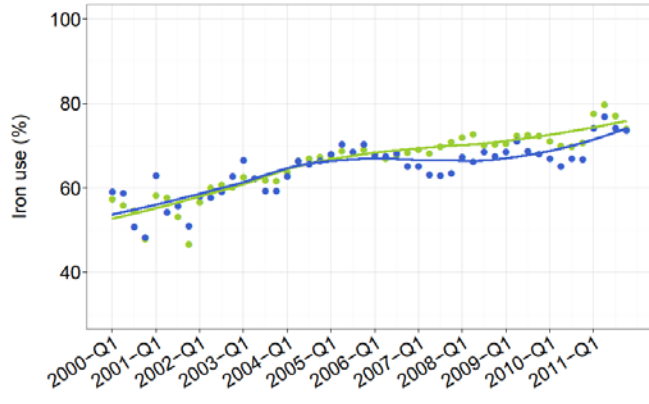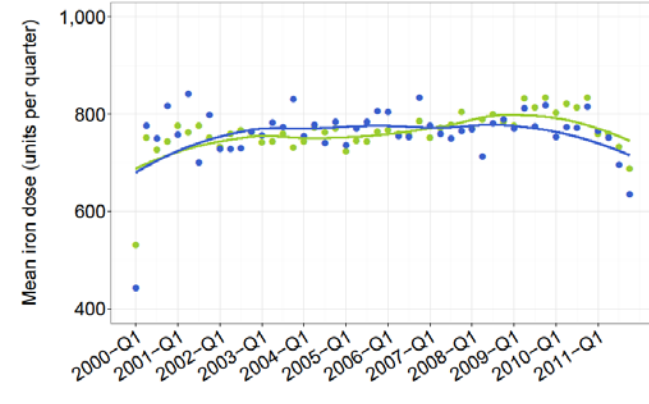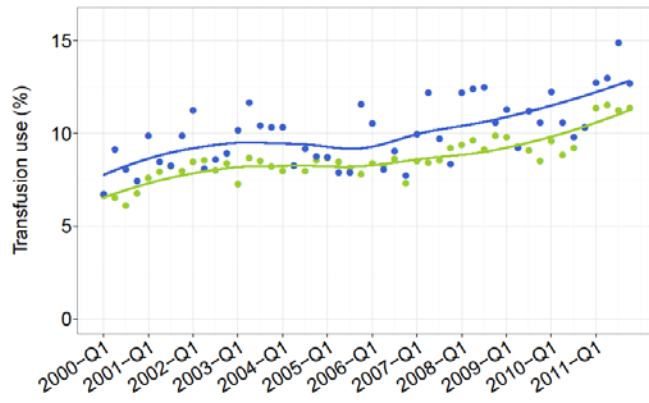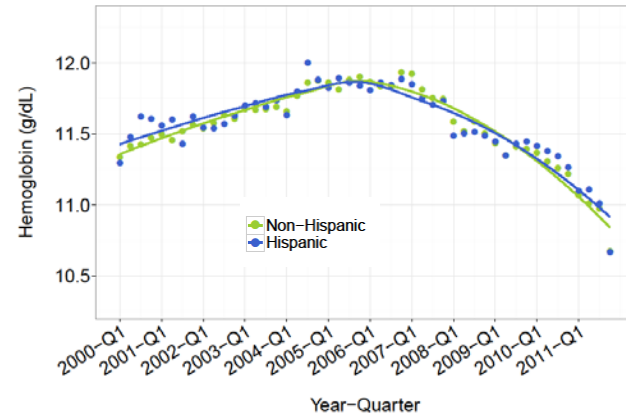

SFigure 11.

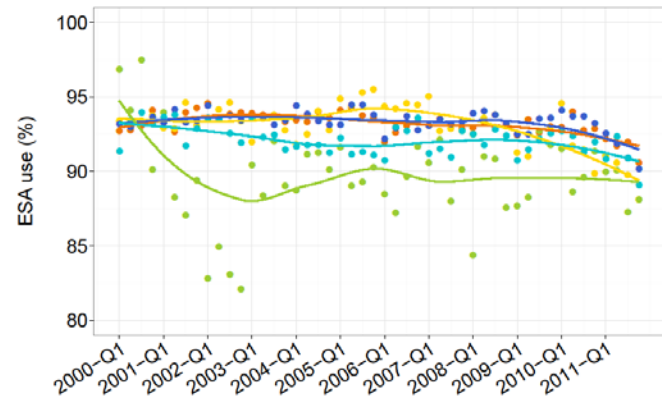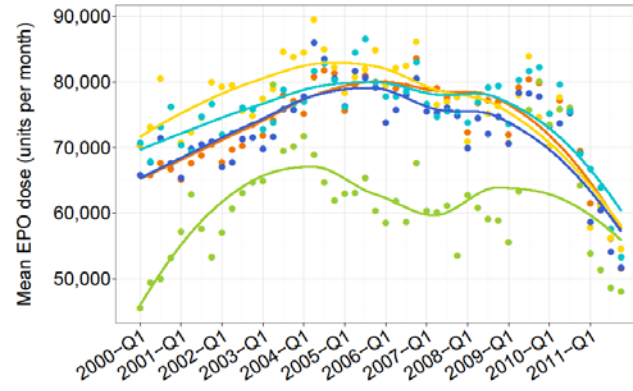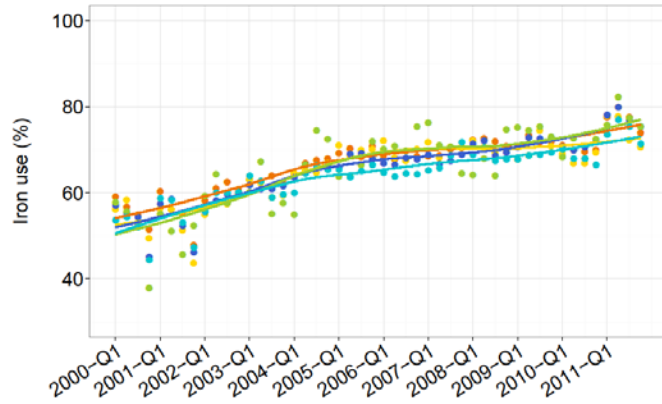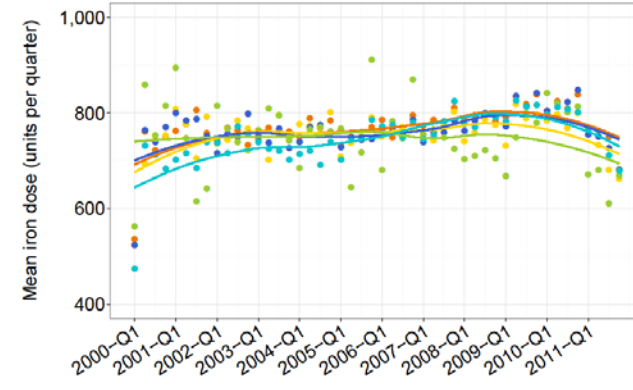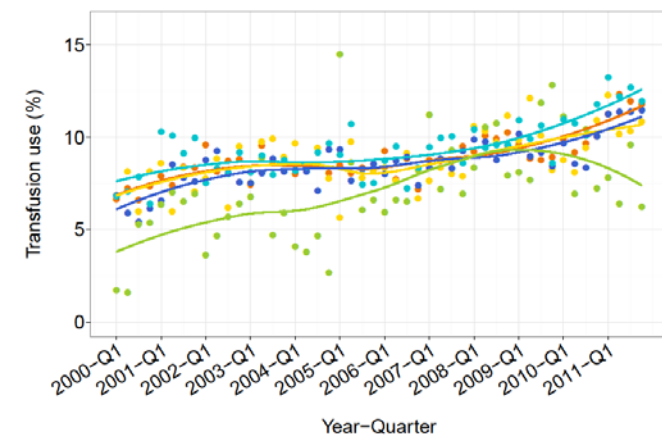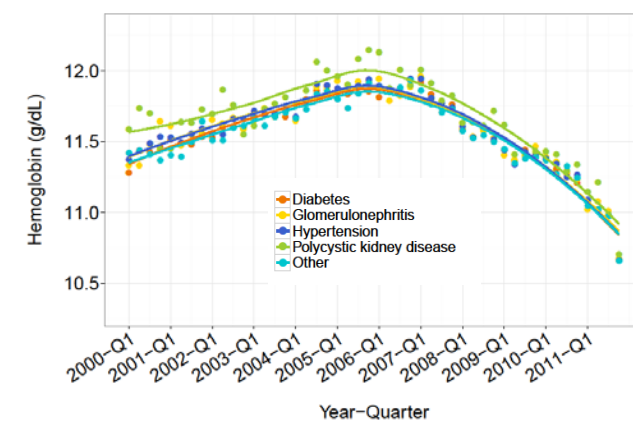

SFigure 12.

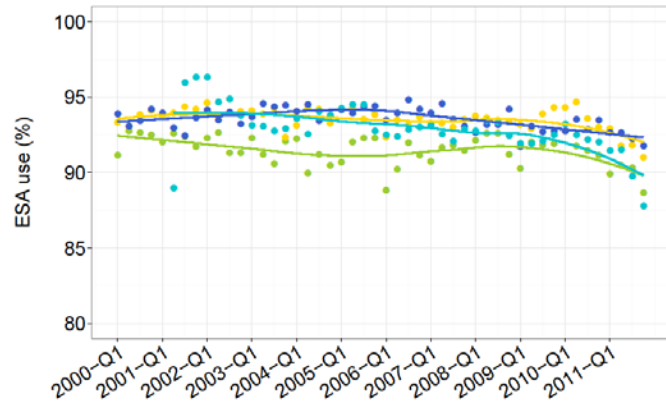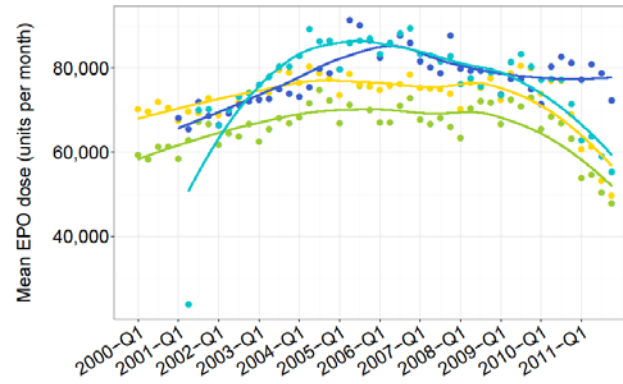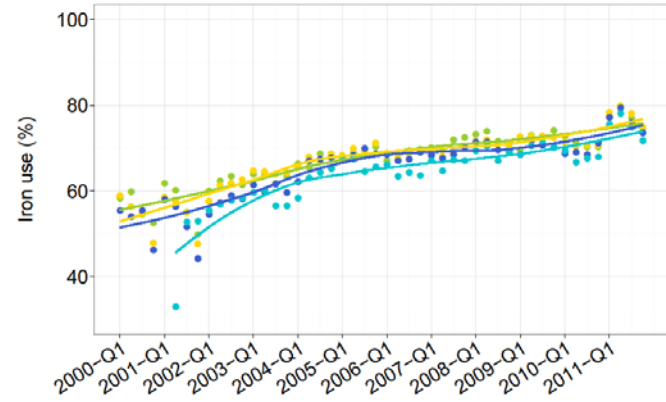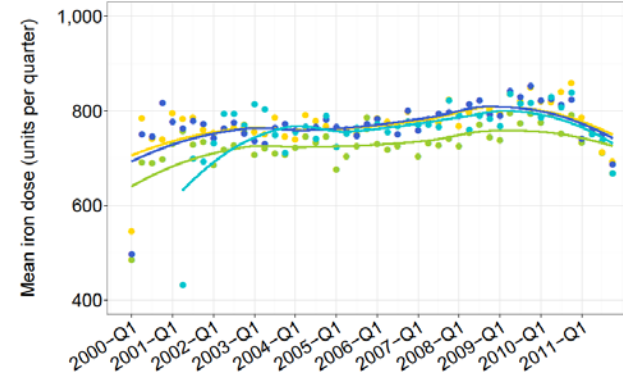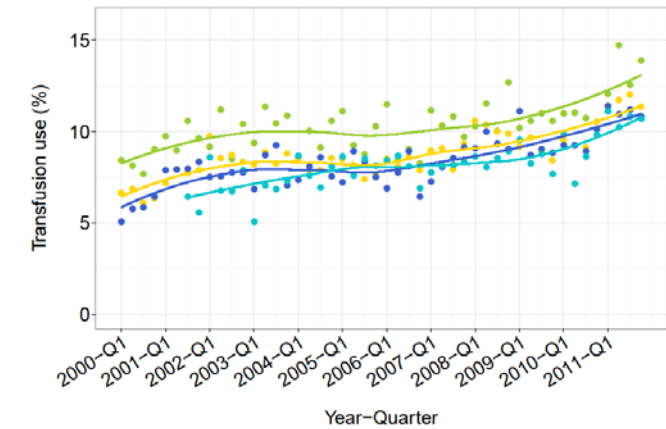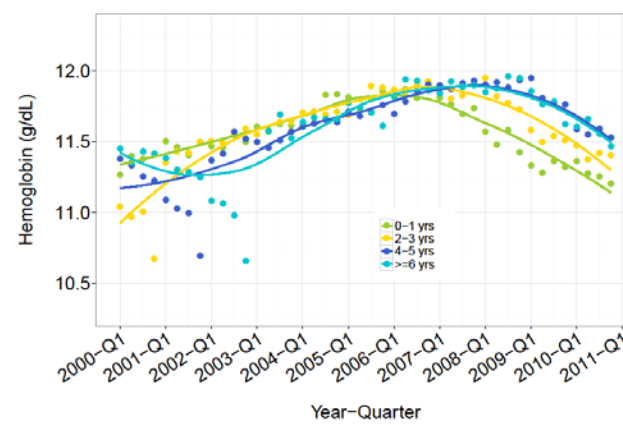

Supplement: NIHMS686616-supplement-Addl_Supp_Materials.pdf [file NIHMS686616-supplement-Addl_Supp_Materials.pdf]
